**UTILIZATION OF PRECONCEPTION CARE AND ASSOCIATED  
FACTORS AMONG REPRODUCTIVE AGE WOMEN IN POKHARA  
METROPOLITAN, KASKI, NEPAL**

**Sita Aryal<sup>1</sup>, Saroj Wagle<sup>2</sup>, Yamuna Marasini<sup>1</sup>, Dr. Tulsi Ram Bhandari<sup>1</sup>**

**<sup>1</sup> School of Health and Allied Sciences, Pokhara University**

**<sup>2</sup> Chifley Business School, Torrens University**

**\*Corresponding Author**

**Sita Aryal**

**[aryalsita777@gmail.com](mailto:aryalsita777@gmail.com)**

## 1 **Abstract**

2 **Background:** Preconception care refers to specific actions taken by an individual or couple to  
3 improve their health before becoming pregnant. Preconception care (PCC) is considered  
4 primary prevention for the future baby and secondary prevention for prospective mothers.  
5 Preconception care utilization in Nepal was very low. Studies on these issues are a newer  
6 concept in Nepal and also in Pokhara Metropolitan.

7 **Objectives:** To assess the utilization of preconception care and associated factors among  
8 reproductive-age group women in Pokhara Metropolitan.

9 **Methods:** A community-based cross-sectional study was conducted from January 2024 to  
10 September 2024. The total study participants were 384 reproductive-age women. Data were  
11 collected using pre-tested, interviewer-administered questionnaires and analyzed with SPSS  
12 after entry into Epi-Data. Descriptive analysis was conducted to show frequencies and  
13 percentages, while bivariate analysis was performed using a chi-square test and multivariate  
14 analysis was done using binary logistic regression to identify factors associated with the  
15 utilization of preconception care. Lastly, odds ratios and 95% confidence intervals were used  
16 to evaluate the statistical significance between the dependent and independent variables.

17 **Results:** Only 0.3% of participants utilize all preconception care components before their last  
18 pregnancy. The acceptance level of utilization of the PCC component was 44.5%. The  
19 commonest item received by the participants was taking a healthy diet (49.2%), checking  
20 weight (43.8%), and blood group screening (53.4%). Age of the respondent AOR=13.89;  
21 (CI:2.49-77.33), religion AOR=3.1;CI(1.43-6.95), occupations of respondents AOR=2.58;  
22 CI(1.67-3.99), knowledge of PCC AOR=5.12; CI(2.99-8.77), attitude towards PCC  
23 AOR=1.92; CI(1.18-3.12), heard about PCC AOR=3.15; CI(1.77-5.59) minutes to reach health  
24 facilities AOR=2.4; CI (1.32-4.35) health insurance use before pregnancy AOR=2.68 ;CI(1.71-

25 4.19), and waiting time at health facilities AOR=1.60;CI(1.02-2.50) were identified as a factors  
26 associated with utilization of PCC.

27 Conclusion: The utilization of preconception care among the women was very low compared  
28 to the recommended services and was influenced by various factors.

29 Community-based advocacy and awareness are needed for women with low levels of  
30 knowledge and attitudes towards preconception care components, as well as those facing  
31 challenges such as time to reach health facilities, lack of insurance use before pregnancy, and  
32 long waiting times at health facilities. Health promotion strategies focused on preconception  
33 care and pre-pregnancy planning may increase utilization rates and improve maternal health.

34 Keywords: Preconception care, Utilization, Maternal Health, Attitude, Knowledge

## 35 **Introduction**

36 Preconception care describes specific actions taken by an individual or couple to improve their  
37 health before becoming pregnant Preconception care involves provision of biomedical,  
38 behavioral and social health interventions to women before conception. Preconception aim to  
39 enhance health status and subside behavioural and environmental factors that could lead to  
40 adverse outcomes for both maternal and child health<sup>1</sup>.

41 The World Health Organization recognizes that providing preconception care can help reduce  
42 baby and maternal morbidity and mortality The World Health Organization addresses several  
43 parts of the PCC package, such as dietary conditions, tobacco use, environmental health,  
44 infertility, interpersonal violence, pregnancy timing, genetic determinants sexually transmitted  
45 infections, HIV, and mental health <sup>1</sup>. Additionally, the goals of preconception care include  
46 identifying concerns regarding genetic conditions, family history, substance abuse, chronic  
47 illnesses, infectious diseases, and proper nutrition and folic acid intake. It also seeks to guide

48 weight management. Vaccinations, family planning, psychosocial issues, domestic abuse, and  
49 appropriate housing conditions are among the other things it entails advising on<sup>2</sup>.

50 Preconception care (PCC) is classified as primary prevention for the future infant and  
51 secondary prevention for prospective mother<sup>3</sup>. Preconception care is important not just for  
52 family planning and lowering maternal and neonatal mortality, but it also improves long-term  
53 health outcomes for teenage girls, women, and children. Adolescent health, particularly  
54 reproductive health, is increasingly recognized as an important component of the healthcare  
55 continuum. Preconception care is widely recognized as a technique to improve women's health  
56 through medical and behavioral changes before conception, with the ultimate goal of enhancing  
57 pregnancy outcomes<sup>2</sup>.

58 Reducing maternal mortality is one of the key global health priorities. Sustainable  
59 Development Goal 3 (SDG) targets to reduce the Maternal Mortality Ratio (MMR) to less than  
60 70 per 1,00,000 live births and the newborn mortality rate to less than 12 per 1000 live births  
61 by 2030<sup>4</sup>. But globally, maternal deaths occur every two minutes which accounts for nearly  
62 800 deaths per day due to preventable pregnancy and childbirth complications. In 2020, total  
63 estimated maternal deaths (2,53,000) worldwide Ninety-five percentage of maternal death  
64 occurs in low and lower-middle-income countries, accounting for 87% in Sub-Sahara Africa  
65 and Southern Asia<sup>5</sup>. The maternal mortality ratio is 412 per 100,000 live births similarly, the  
66 under-five mortality rate is 67 per 1000 live birth and the neonatal mortality rate is 29 per  
67 1000<sup>6</sup>. Similarly, each year, approximately 208 million pregnancies take place out of them,  
68 46% are unintended pregnancy<sup>7</sup>.

69 In Nepal, 653 of the 12,976 deaths in 2021 among women aged 15 to 49 were pregnancy-  
70 related, with 622 confirmed as maternal deaths<sup>8</sup> According to studies, induced abortion was  
71 responsible for half of all maternal deaths in Nepal, where abortion was illegal until September

72 2002. Unsafe practices by traditional birth attendants lead to maternal mortality. According to  
73 Nepal Demographic Health Survey (2006) revealed that 82% of women gave birth at home.  
74 However, by 2022, this ratio had improved to only 19% which indicates that women are still  
75 delivering at home (NDHS 2022). Although there is huge progress in maternal and child health  
76 but still, the maternal mortality ratio is 151 per one lakh live births, while infant and neonatal  
77 mortality rates are 28 and 21 deaths per 1,000 live births, respectively (NPHC report, 2021;  
78 NDHS report, 2022).

79 Most of the complications related to pregnancy and adverse birth outcomes could be prevented  
80 through the PCC strategy approach.<sup>9</sup> Preconception care (PCC) helps to identify and prevent  
81 congenital abnormalities such as fetal alcohol spectrum disorders, congenital heart diseases,  
82 neural tube defects, and clefts <sup>10</sup>. The main modifiable risk factors for stillbirth are dietary  
83 variables like obesity or undernutrition, maternal age, maternal infection, and non-  
84 communicable disorders like diabetes or hypertension<sup>11</sup>. Anemia has been identified as a  
85 substantial risk factor for maternal death, increasing the likelihood of maternal mortality during  
86 and after childbirth <sup>11</sup>. Perinatal fatalities are increased by a 50% greater chance among children  
87 who are born by a mother under the age of 20 while comparing women aged 20 to 29 <sup>1</sup>.  
88 Violence against girls and women has negative physical, psychological, and reproductive  
89 repercussions, including an increased chance of premature delivery and low-birth-weight  
90 infants<sup>9</sup>.

91 The evidence shows that the utilization of PCC is low. Studies conducted in developing  
92 countries such as Ethiopia<sup>12</sup>, Nigeria <sup>13</sup>Bhutan<sup>10</sup>, Nepal<sup>14</sup> and Sri Lanka <sup>15</sup> revealed  
93 preconception care of 22.3%, 23.4%, 21.8%, 2% and 27.2% respectively. Similarly the study  
94 conducted in Los Angeles (29.7%), and Saudi Arabia (29.3%)<sup>16</sup> shows a slightly higher rate of  
95 utilization of PCC.

96 Factors associated with utilization of preconception care were age, education status of mother,  
97 occupation of mother, husband's education level, husband's occupation, house wealth status,  
98 planned pregnancy, previous ANC visit, previous PNC visit, use, previous adverse pregnancy  
99 outcomes, Knowledge on Preconception care, attitude towards PCC, distance from health  
100 facilities, waiting time at health facilities, autonomy to maternal health.<sup>2,10,17,18</sup>

101 In the context of Nepal, a comprehensive national policy addressing preconception care is not  
102 in place as the deadline for meeting the Sustainable Development Goal of reaching a maternal  
103 mortality ratio of 70 per 100,000 live births, executing an intervention strategy that integrates  
104 a continuum-of-care approach through PCC is crucial to minimizing maternal and child  
105 mortality.

106 Despite its important role in improving mother and child health, a large proportion of women  
107 are unaware of how their preconception care can influence to reduce the risk of adverse  
108 pregnancy outcomes. In practice, there is a lack of checkups or care taken by women before  
109 being pregnant and Antenatal care is too late to reduce the harmful effects that a woman's (and  
110 her partner's) health risks or health problems may have on the fetus during the critical period  
111 of organogenesis. Different studies have been done regarding the knowledge and practices on  
112 preconception care among reproductive-age women but there is limited research on finding out  
113 the factors associated with utilization of preconception care. This study aims to assess the status  
114 of preconception care utilization and its associated factors among reproductive-age women of  
115 Pokhara Metropolitan.

117 **Conceptual framework and variables of the study**

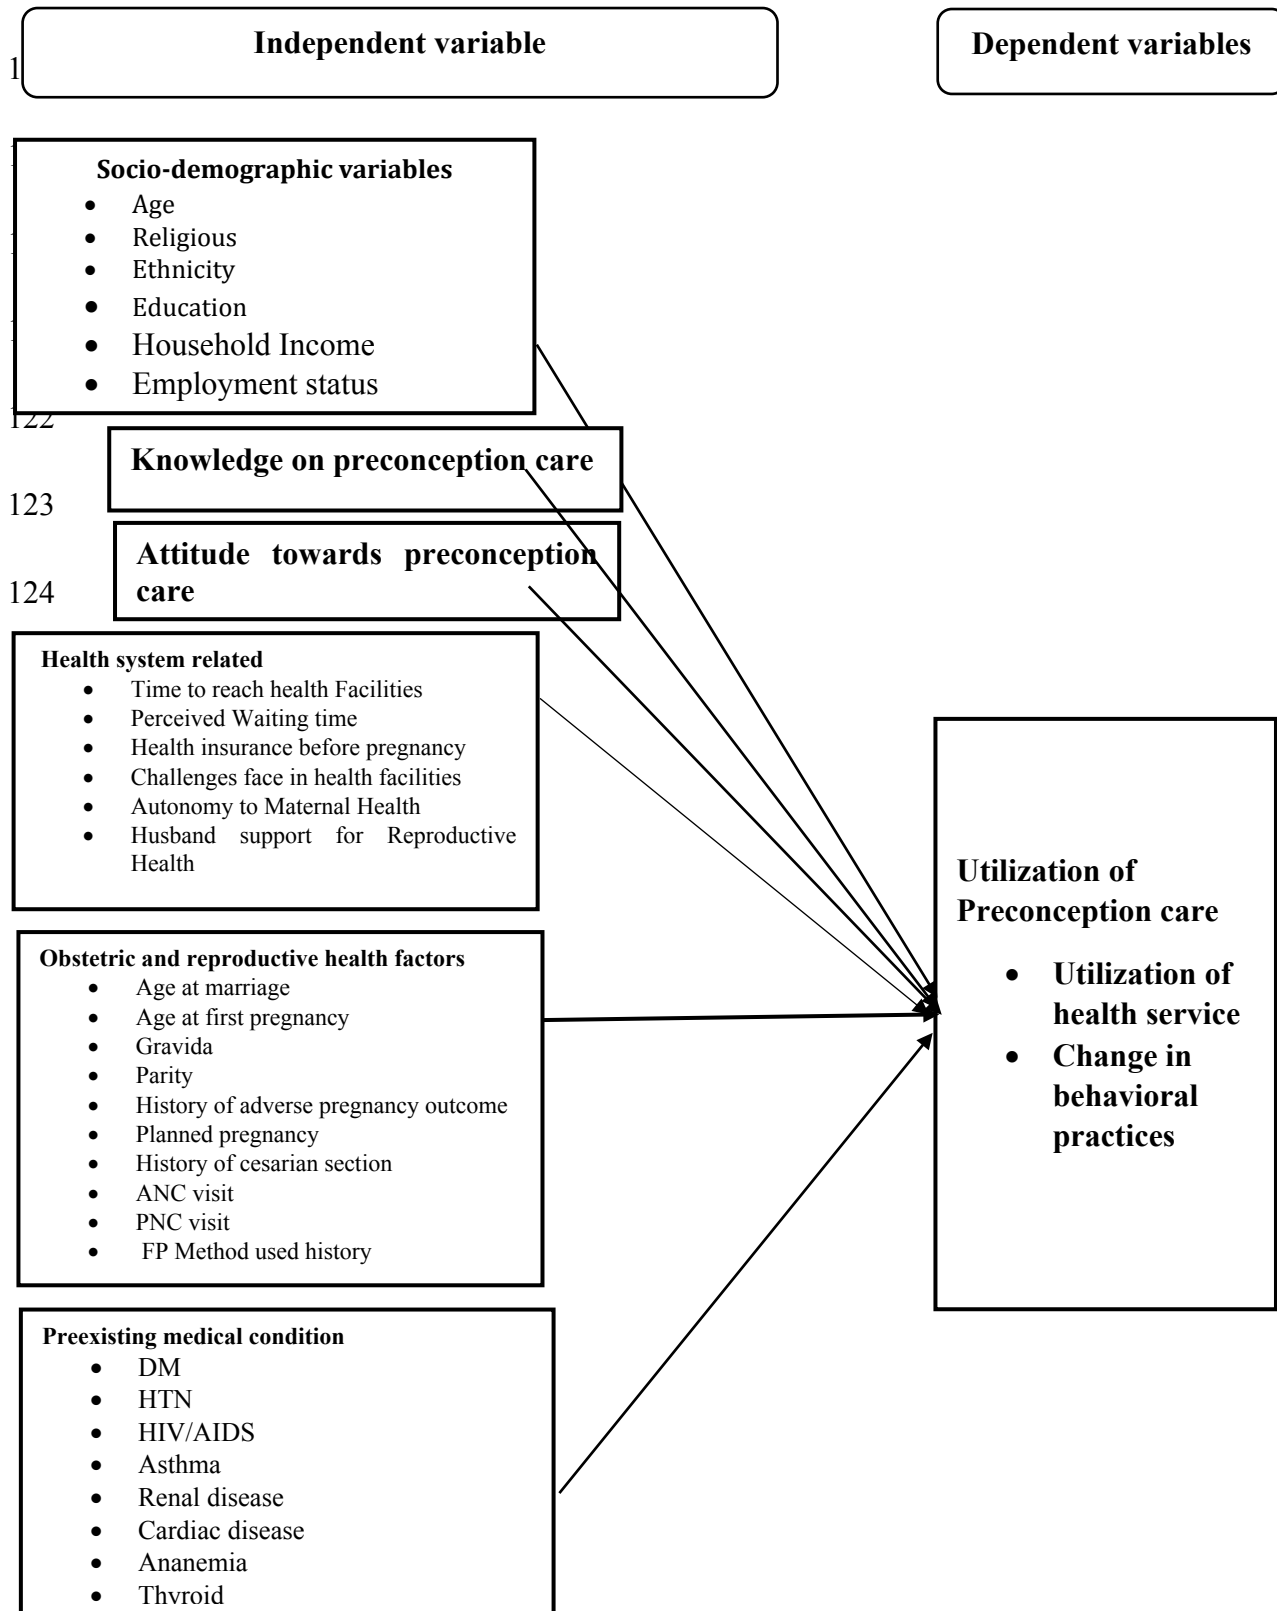

Figure 1: Conceptual Framework

125 **Method and materials**

126 **Study design:**

127 The study was a community-based cross-sectional study among married women of  
128 reproductive age in Pokhara Metropolitan

129 **Study Setting, participants and sampling procedure**

130 A study was conducted in Pokhara metropolitan from January 2024 to September 2024. A  
131 consecutive sampling was carried out among participant. Inclusion criteria was, all Married  
132 women of reproductive age having a child under one year of age, women living in selected  
133 wards for more than 6 months and above were included in the study. The sample size was  
134 calculated using the formula  $(n_o) = \frac{Z^2pq}{d^2}$  for estimating the required sample with a confidence  
135 level of 95% (i.e.,  $Z = 1.96$ ). The allowable error (d) was considered 0.05 (5%). The prevalence  
136 of utilizations of preconception care was unknown; thus, the estimated sample size was 384.  
137 Data were collected through proportionate sampling method and sample size was determine  
138 through consecutive sampling.

139 **Instrument**

140 The research tool was a structured interview schedule adopted from the study conducted in  
141 Ethiopia (Setegn Alie et al., 2022) and designed in the Nepali language. The schedule  
142 comprised eight Parts:

143 Part 1 is Socio-demographic characteristics comprises 10 items Part 2 is knowledge of  
144 preconception care comprises 25 items. Each item has Yes and No answers “Yes” counted as  
145 1 and “No” counted as 0. The score of knowledge level ranges from 1 to 25. After scoring, the  
146 result of the median values is 18. The score which is less or equal to 18 is categories as poor



147 knowledge and more than 18 as good knowledge. Part C utilization of preconception care  
148 which consists of 18 items each items has “Yes” and “No”, answer “Yes” counted as 1 and  
149 “No” counted as 0 the score was summed then the total score was ranges from 1 to 18, and the  
150 median score is 5. The score which is less or equal to 5 is categorised as low acceptance and  
151 more than 5 is regarded as acceptance, Part D attitude towards preconception care consists of  
152 11 items. Likert scale with scores of 1 = “strongly disagree”, 2 = “disagree”, 3 = “neutral”, 4 =  
153 "agree,” and 5 = strongly agree” was used. Similarly, for negatively worded items, the score  
154 was reversed. The total score was summed up, and the final score ranges from 24 to 51; the  
155 median value score is 40. The score less than or equal to 40 is categorised as negative attitude  
156 and more than 40 is categorized as positive attitude. Part E pre-existing medical illness, Part F  
157 is obstetric and reproductive history consists of 9 items Part G- health facility related 17 items  
158 and Part H-wealth of the household consists of 12 items, measured through the International  
159 Wealth Index, which measures the economic situation of households based on the possession  
160 of consumer durables and housing characteristics. IWI ranges from 0 to 100; a percentile is  
161 used to categories the ranges. and categorized as lowest, Second, middle, fourth and highest  
162 based on Nepal demography health survey.

### 163 **Data Analysis**

164 Descriptive statistics such as frequency, percentage, mean, median and standard deviation were  
165 used to present the findings in the form of a table and figures. Bivariate analysis was performed  
166 to find out the association between dependent and independent variables and multivariate  
167 logistic regression models were analyzed to determine factors associated with the utilization of  
168 preconception care. variables with a p-value less than 0.05 in the bivariable logistic regression  
169 were included in the multivariable logistic regression model based on the conceptual  
170 framework three models of logistic regression were performed. In the first model dependent  
171 variable utilization of PCC and Sociodemographic characteristics were assessed, in the second

172 model utilization of PCC and knowledge of PCC, attitude towards PCC were assessed. In the  
173 third model, the utilization of PCC and health facilities service-related characteristics were  
174 assessed. The multicollinearity or interaction between independent variables were checked  
175 using the VIF (Variance Inflation factor) and all the variables less than 2 indicated as no  
176 multicollinearity issues. The strength of association between dependent and independent  
177 variables was measured using both Unadjusted Odds Ratio (UOR) and Adjusted Odds Ratio  
178 (AOR) along with their 95% CI and p-values. Variables with p-values less than 0.05 were  
179 considered statistically significant. The goodness of fit of the model was assessed using the  
180 Hosmer and Lemeshow test, the p-value more than 0.05 was considered as good for model  
181 fitness.

## 182 **Ethical consideration**

183 Ethical approval was taken from the Institutional Review Committee (IRC) of Pokhara  
184 University (Ref No.194-2080/81), before conducting the study. Approval was also taken from  
185 the local authorities, Pokhara Metropolitan Health Section. The purpose of the study was  
186 clearly explained to the participants, and both verbal and written consent were obtained from  
187 each participant. They were also informed of their right to withdraw from the survey at any  
188 time if they felt uncomfortable continuing.

## 189 **Results**

### 190 **Univariate analysis**

191 Socio-demographic characteristics of respondents (n=384)

192 Table1: Socio-demographic characteristics

| <b>Variables</b>    | <b>Number</b> | <b>Percent (%)</b> |
|---------------------|---------------|--------------------|
| <b>Age in years</b> |               |                    |

|                                  |     |      |
|----------------------------------|-----|------|
| ≤ 20                             | 22  | 5.7  |
| 20-35                            | 338 | 88.0 |
| >35                              | 24  | 6.3  |
| Mean =28.43±4.94, min=16, max=44 |     |      |
| <b>Religion</b>                  |     |      |
| Hindu                            | 349 | 90.9 |
| Buddhist                         | 19  | 4.9  |
| Muslim                           | 5   | 1.3  |
| Christian                        | 11  | 2.9  |
| <b>Ethnicity</b>                 |     |      |
| Dalit                            | 85  | 22.1 |
| Janajati                         | 118 | 30.7 |
| Brahman/ Chhetri                 | 163 | 42.4 |
| Religious Minorities             | 18  | 4.7  |
| <b>Family type</b>               |     |      |
| Nuclear                          | 174 | 45.3 |
| Joint                            | 177 | 46.1 |
| Extended                         | 33  | 8.6  |
| <b>Family size</b>               |     |      |
| ≤ 4                              | 190 | 49.5 |
| >4                               | 194 | 50.5 |

193 Majority of the participants were between 20-35 years (88%), Most people are Hindu (90.9%),  
 194 with a small portion of Buddhists (4.9%), Christians (2.9%), and Muslims (1.3%). Brahman/  
 195 Chhetri (42.4%) is the largest group, followed by Janajati, Dalit and religious minorities by  
 196 30.7%, 22.1% and 4.7% respectively. Nearly similar respondents lived in nuclear (45.3%) and  
 197 joint families (46.1%) with only 8.6% in extended families. Family size is also roughly similar,  
 198 with 49.5% having four or fewer members and 50.5% having more than four members (See  
 199 Table 1).

200 **Socio-economic characteristics of respondents (n=384)**

201 Table2: Socio-economic Characteristics

| <b>Variables</b>               | <b>Number</b> | <b>Percent (%)</b> |
|--------------------------------|---------------|--------------------|
| <b>Education level</b>         |               |                    |
| Illiterate                     | 5             | 1.3                |
| Informal Education             | 7             | 1.8                |
| Basic                          | 76            | 19.8               |
| Secondary                      | 199           | 51.8               |
| Graduate and above             | 97            | 25.3               |
| <b>Husband Education Level</b> |               |                    |
| Illiterate                     | 9             | 2.3                |
| Informal                       | 15            | 3.9                |
| Basic                          | 76            | 19.8               |
| Secondary                      | 178           | 46.4               |
| Graduate and above             | 106           | 27.6               |
| <b>Respondent Occupation</b>   |               |                    |
| Housemaker                     | 209           | 54.4               |
| Farmer                         | 18            | 4.7                |
| Business                       | 56            | 14.6               |
| Government Employee            | 22            | 5.7                |
| Unemployed                     | 22            | 5.7                |
| Private Employer               | 43            | 11.2               |
| Daily worker                   | 10            | 2.6                |
| Foreign services               | 4             | 1.0                |
| <b>Husband Occupation</b>      |               |                    |
| Farmer                         | 8             | 2.1                |
| Business                       | 92            | 24.0               |
| Government Employee            | 29            | 7.6                |
| Unemployed                     | 4             | 1.0                |
| Private Employer               | 75            | 19.5               |
| Daily worker                   | 71            | 18.5               |
| Foreign services               | 105           | 27.3               |
| <b>Wealth Index</b>            |               |                    |

|         |    |      |
|---------|----|------|
| Lowest  | 73 | 19.0 |
| Second  | 86 | 22.4 |
| Middle  | 83 | 21.6 |
| Fourth  | 65 | 16.9 |
| Highest | 77 | 20.1 |

202 IWI median=64.48, Min=21, Max=100

203 The majority of the respondents 51% have their secondary education, with their husbands  
 204 having secondary level education comprising (46.4%). Regarding respondents' occupation,  
 205 most respondents are housemakers (54.4%) while for husbands' occupation, most of them are  
 206 foreign services (27.3%). regarding the household index, the second quintile has the highest  
 207 proportion at (22.4%). (Table- 2).

## 208 **Heard about Preconception Care and Source of Information**

209 Table 3: Heard about Preconception Care and Source of Information

| <b>Variables</b>                                          | <b>Number</b> | <b>Percent (%)</b> |
|-----------------------------------------------------------|---------------|--------------------|
| <b>Heard about Preconception care</b>                     |               |                    |
| Yes                                                       | 226           | 58.9               |
| No                                                        | 158           | 41.1               |
| <b>Sources of information (multiple responses, n=513)</b> |               |                    |
| Health worker                                             | 132           | 58.4               |
| School                                                    | 68            | 30.1               |
| Neighbors                                                 | 44            | 19.5               |
| Mass media                                                | 145           | 64.2               |
| family and friends                                        | 124           | 54.9               |

210

## 211 **Knowledge, attitude and utilization level of respondents**

212 Table 4 : Preconception Knowledge Attitude Level of Participants

| <b>Level of knowledge</b> | <b>Frequency</b> | <b>Percent (%)</b> |
|---------------------------|------------------|--------------------|
| Poor Knowledge            | 201              | 52.3               |
| Good Knowledge            | 183              | 47.7               |
| Median=18, Min=1, Max=25  |                  |                    |

Table 5 : Preconception Knowledge Attitude Level of Participants

| <b>Level of attitude</b>  | <b>Frequency</b> | <b>Percent (%)</b> |
|---------------------------|------------------|--------------------|
| Negative Attitude         | 207              | 53.9               |
| Positive Attitude         | 177              | 46.1               |
| Median=40, Min=24, Max=51 |                  |                    |

213 Table 6: Utilization of Preconception Care Component

| <b>Level Utilization</b> | <b>Frequency</b> | <b>Percent (%)</b> |
|--------------------------|------------------|--------------------|
| Low acceptance           | 213              | 55.5               |
| Acceptance               | 171              | 44.5               |

214 Median=5, Min=1, Max=18

215 Less than half (47.7%) of respondents have good knowledge while 46.1% exhibit a negative  
 216 attitude towards preconception care furthermore, only (44.5%) of the respondents utilize  
 217 preconception care at the acceptance level (Table 4,5,6).

## 218 **Preconception Care Components Utilization**

219 Table 7: Preconception Care Component Utilization

| <b>Variable</b>        | <b>Frequency</b> | <b>Percent (%)</b> |
|------------------------|------------------|--------------------|
| <b>Take folic acid</b> |                  |                    |
| Yes                    | 138              | 35.9               |
| No                     | 246              | 64.1               |
| <b>Take iron</b>       |                  |                    |
| Yes                    | 32               | 8.3                |
| No                     | 352              | 91.7               |

|                                     |     |      |
|-------------------------------------|-----|------|
| <b>Take a healthy diet</b>          |     |      |
| Yes                                 | 189 | 49.2 |
| No                                  | 195 | 50.8 |
| <b>Take extra meal</b>              |     |      |
| Yes                                 | 35  | 9.1  |
| No                                  | 349 | 90.9 |
| <b>Check weight</b>                 |     |      |
| Yes                                 | 168 | 43.8 |
| No                                  | 216 | 56.3 |
| <b>Screen for HIV/AIDS</b>          |     |      |
| Yes                                 | 104 | 27.1 |
| No                                  | 280 | 72.9 |
| <b>Screen for STI</b>               |     |      |
| Yes                                 | 106 | 27.6 |
| No                                  | 278 | 72.4 |
| <b>Screen for Diabetic mellitus</b> |     |      |
| Yes                                 | 128 | 33.3 |
| No                                  | 256 | 66.7 |
| <b>Screen for hypertension</b>      |     |      |
| Yes                                 | 179 | 46.6 |
| No                                  | 205 | 53.4 |
| <b>Screen for anaemia</b>           |     |      |
| Yes                                 | 153 | 39.8 |
| No                                  | 231 | 60.2 |
| <b>Screen for blood group</b>       |     |      |
| Yes                                 | 205 | 53.4 |
| No                                  | 179 | 46.6 |
| <b>Screen for Hepatitis B</b>       |     |      |
| Yes                                 | 40  | 10.4 |
| No                                  | 344 | 89.6 |
| <b>Take tetanus vaccine</b>         |     |      |

|                                                          |     |      |
|----------------------------------------------------------|-----|------|
| Yes                                                      | 21  | 5.5  |
| No                                                       | 363 | 94.5 |
| <b>Ever smoked</b>                                       |     |      |
| Yes                                                      | 12  | 3.1  |
| No                                                       | 372 | 96.9 |
| <b>Drinking alcohol</b>                                  |     |      |
| Yes                                                      | 23  | 6    |
| No                                                       | 361 | 94   |
| <b>Consult anyone for advice about becoming pregnant</b> |     |      |
| Yes                                                      | 135 | 35.2 |
| No                                                       | 249 | 64.8 |
| <b>Husband has screened for any disease</b>              |     |      |
| Yes                                                      | 82  | 21.4 |
| No                                                       | 302 | 78.6 |
| <b>Stopped or removed family planning method</b>         |     |      |
| Yes                                                      | 83  | 21.6 |
| No                                                       | 301 | 78.4 |

220 Most of the respondents did not take folic acid (64.1%) or iron supplements (91.7%), Similarly  
 221 the highest proportion did not screen for HIV/AIDS (72.9%), STIs (72.4%), diabetic mellitus  
 222 (66.7%), or hypertension (53.4%). Furthermore, 64.8% did not consult anyone for advice about  
 223 becoming pregnant (Table 7).

#### 224 **Pre-existing medical illness**

225 Table 8: Pre-existing medical illness

| <b>Variables</b>                                              | <b>Frequency</b> | <b>Percent (%)</b> |
|---------------------------------------------------------------|------------------|--------------------|
| <b>Medical illness</b>                                        |                  |                    |
| Yes                                                           | 46               | 12                 |
| No                                                            | 338              | 88                 |
| <b>Type of medical illnesses (Multiple responses, n=48) *</b> |                  |                    |



|                       |    |      |
|-----------------------|----|------|
| Epilepsy              | 3  | 6.5  |
| Hypertension          | 9  | 19.6 |
| Diabetes mellitus     | 7  | 15.2 |
| Anemia                | 2  | 4.3  |
| Asthma                | 4  | 8.7  |
| Cardiac problem       | 2  | 4.3  |
| Renal disease         | 2  | 4.3  |
| Thyroid               | 16 | 34.8 |
| other medical illness | 3  | 6.5  |

226 Of the total 384 respondents, 46 (12%) of them experienced any chronic diseases in their life.  
 227 The commonest diseases were thyroid 16 (34.8%), Hypertension 9 (19.6%), Diabetic Mellitus  
 228 7 (15.2%) and the least common diseases were anemia, cardiac diseases and renal disease  
 229 i.e.2(4.3%) for each (Table 8).

### 230 **Obstetric and Reproductive Health Characteristics**

231 Table 9: Obstetric and Reproductive Health Characteristics

| <b>Variables</b>                                  | <b>Frequency</b> | <b>Percent (%)</b> |
|---------------------------------------------------|------------------|--------------------|
| <b>Age at first pregnancy</b>                     |                  |                    |
| ≤ 20                                              | 93               | 24.2               |
| > 20                                              | 291              | 75.8               |
| Mean=23, Min=13, Max=41                           |                  |                    |
| <b>Gravida</b>                                    |                  |                    |
| only 1 pregnancy                                  | 157              | 40.9               |
| 2-4 pregnancy                                     | 222              | 57.8               |
| ≥ 5                                               | 5                | 1.3                |
| <b>Parity</b>                                     |                  |                    |
| Primipara (one deliveries)                        | 206              | 53.6               |
| Multi Parous (more than or equal to 2 deliveries) | 178              | 46.4               |
| <b>Planning for pregnancy</b>                     |                  |                    |

|                                                                        |     |      |
|------------------------------------------------------------------------|-----|------|
| Yes                                                                    | 259 | 67.4 |
| No                                                                     | 125 | 32.6 |
| <b>History of adverse pregnancy outcome</b>                            |     |      |
| Yes                                                                    | 110 | 28.6 |
| No                                                                     | 274 | 71.4 |
| <b>Type of adverse pregnancy outcome (multiple responses, n=110) *</b> |     |      |
| Spontaneous abortion history                                           | 54  | 54.5 |
| stillbirth history                                                     | 7   | 7.1  |
| preterm birth history                                                  | 26  | 26.3 |
| congenital abnormality history                                         | 11  | 11.1 |
| neonatal death history                                                 | 6   | 6.1  |
| low birth weight baby weight                                           | 38  | 38.4 |
| <b>Cesarean section History</b>                                        |     |      |
| Yes                                                                    | 125 | 32.6 |
| No                                                                     | 259 | 67.4 |
| <b>History of contraceptive use</b>                                    |     |      |
| Yes                                                                    | 131 | 34.1 |
| No                                                                     | 253 | 65.9 |
| <b>Previous use of family planning</b>                                 |     |      |
| IUCD                                                                   | 2   | 1.5  |
| Implant                                                                | 13  | 9.9  |
| Depo                                                                   | 52  | 39.7 |
| Oral Contraceptive                                                     | 15  | 11.5 |
| Condom                                                                 | 49  | 37.4 |
| <b>ANC visit for the index pregnancy</b>                               |     |      |
| Yes                                                                    | 381 | 99.2 |
| No                                                                     | 3   | 0.8  |
| <b>Previous ANC visit for nearest pregnancy (n=382)</b>                |     |      |
| 1-2                                                                    | 11  | 2.9  |
| 3                                                                      | 13  | 3.4  |
| ≥ 4                                                                    | 358 | 93.7 |
| <b>PNC visit for index pregnancy</b>                                   |     |      |

|                                  |     |      |
|----------------------------------|-----|------|
| Yes                              | 344 | 89.6 |
| No                               | 40  | 10.4 |
| <b>Times of PNC visit(n=146)</b> |     |      |
| 1-2                              | 310 | 89.6 |
| ≥ 3                              | 36  | 10.4 |

232 Note – \* -Multiple responses (the total sum of the percentage is more than 100% because of multiple  
233 responses).

234 The third quartile (75.8%) of the respondents had their first pregnancy after age 20 and the  
235 majority (53.6%) had only one delivery. Planned pregnancy comprised (64.4%) and (28.6%)  
236 had a history of adverse pregnancy outcomes with spontaneous abortion being the most  
237 common adverse outcome (54.5%). Similarly, more than one-fourth (32.6%) had a history of  
238 cesarean section, and 65.9% had never used contraceptives. Nearly all the respondents (93.7%)  
239 had ANC visits for their last pregnancy, with (93.7%) having four or more visits (Table 9).

#### 240 **Health service-related characteristics**

241 Table 10: Health services-related characteristics

| <b>Variables</b>                                       | <b>Number (n=384)</b> | <b>Percent %)</b> |
|--------------------------------------------------------|-----------------------|-------------------|
| <b>Minutes to reach Health facilities</b>              |                       |                   |
| ≤ 30 minutes                                           | 316                   | 82.3              |
| >30 minutes                                            | 68                    | 17.7              |
| <b>Distance from health facilities</b>                 |                       |                   |
| ≤ 2 km                                                 | 148                   | 38.5              |
| > 2 km                                                 | 236                   | 61.5              |
| <b>means of transport</b>                              |                       |                   |
| Public Vehicle                                         | 154                   | 40.1              |
| Private Vehicle                                        | 128                   | 33.3              |
| Walk                                                   | 102                   | 26.6              |
| <b>Visit health facilities for a healthy pregnancy</b> |                       |                   |
| Yes                                                    | 125                   | 32.6              |

|                                                                    |     |      |
|--------------------------------------------------------------------|-----|------|
| No                                                                 | 259 | 67.4 |
| <b>Pay to get services(n=125)</b>                                  |     |      |
| Yes                                                                | 97  | 77.6 |
| No                                                                 | 28  | 22.4 |
| <b>Affordability of payment(n=97)</b>                              |     |      |
| Expensive                                                          | 35  | 36.5 |
| Cheap                                                              | 52  | 53.6 |
| Free                                                               | 10  | 10.3 |
| <b>Participating in preconception counselling(n=125)</b>           |     |      |
| Yes                                                                | 96  | 77.4 |
| No                                                                 | 28  | 22.6 |
| <b>Type of counselling (multiple response (n=96)</b>               |     |      |
| Maintaining optimal weight control                                 | 43  | 44.8 |
| maintaining a regular exercise program                             | 54  | 56.3 |
| ceasing tobacco, alcohol, and drug use                             | 58  | 60.4 |
| Follows the prescription of the health worker                      | 90  | 93.8 |
| Take healthy diet                                                  | 96  | 100  |
| <b>Challenges faced by respondents in Health facilities(n=124)</b> |     |      |
| Yes                                                                | 59  | 47.2 |
| No                                                                 | 66  | 52.8 |
| <b>Type of challenges (multiple responses) (n=79)</b>              |     |      |
| Lack of privacy                                                    | 9   | 15.3 |
| Lack of service integrity                                          | 5   | 8.5  |
| Shortage of logistic supply                                        | 13  | 22.0 |
| Long waiting hour                                                  | 52  | 88.1 |
| <b>Availability of adequate laboratory services</b>                |     |      |
| Yes                                                                | 303 | 78.9 |
| No                                                                 | 62  | 16.1 |
| Don't know                                                         | 19  | 4.9  |
| <b>Availability of medicine</b>                                    |     |      |
| Yes                                                                | 360 | 93.8 |
| No                                                                 | 20  | 5.2  |
| Don't Know                                                         | 4   | 1    |

| <b>Using Health insurance</b>                                            |     |      |
|--------------------------------------------------------------------------|-----|------|
| Yes                                                                      | 151 | 39.3 |
| No                                                                       | 233 | 60.7 |
| <b>Autonomy to maternal health care services</b>                         |     |      |
| Self                                                                     | 228 | 59.4 |
| Husband                                                                  | 25  | 6.5  |
| Both                                                                     | 129 | 33.6 |
| Family member                                                            | 2   | 0.5  |
| <b>Receive health care access assistance (Multiple response (n=717))</b> |     |      |
| Husband                                                                  | 282 | 73.4 |
| Relatives                                                                | 48  | 12.5 |
| Family                                                                   | 186 | 48.4 |
| Neighbours                                                               | 58  | 15.1 |
| Self                                                                     | 143 | 37.2 |
| <b>Perceived waiting time to get services</b>                            |     |      |
| ≤ 60 minutes                                                             | 236 | 61.5 |
| > 60 minutes                                                             | 148 | 38.5 |

242 The result revealed that 82.3% of the respondents reached health facilities within 30 minutes  
 243 and 61.5% lived within  $\leq 2$  km distance from health facilities. Public vehicle is a common  
 244 vehicle used by respondents (40.1%). Only 32.6% visited health facilities for healthy  
 245 pregnancies of those who visited, 77.6% needed to pay for their services and out of them 36.5%  
 246 finds expensive and 77.4% took part in preconception counselling. The challenges face by  
 247 47.2% respondents in health facilities and most commonly due to long waiting hour. However,  
 248 78.9% of participants revealed that 78.9% had adequate laboratory services and 93.8% had  
 249 access to medicine. Only 39.3% use health insurance and autonomy to maternal health services  
 250 was mainly self-directed (59.4%). lastly, 61.5% perceived a waiting time of  $\leq 60$  to get  
 251 services (Table-10).

253 **Bivariate analysis**

254 **Association of Utilization of Preconception Care and Sociodemographic Characteristics**

255 Table 11: Association of Utilization of Preconception Care and Sociodemographic  
256 Characteristics

| Variable             | Utilization of Preconception care |                  | Chi-square Value | df | p-value      |
|----------------------|-----------------------------------|------------------|------------------|----|--------------|
|                      | Low acceptance n (%)              | Acceptance n (%) |                  |    |              |
| <b>Age</b>           |                                   |                  |                  |    |              |
| < 20 Yrs             | 20 (90.9)                         | 2 (9.1)          | 13.279           | 2  | <0.001*      |
| 20-35 Yrs            | 183 (54.1)                        | 155 (45.9)       |                  |    |              |
| > 35 Yrs             | 10 (41.7)                         | 14 (58.3)        |                  |    |              |
| <b>Religion</b>      |                                   |                  |                  |    |              |
| Hindu                | 201 (57.6)                        | 148 (42.4)       | 6.99             | 1  | <b>0.008</b> |
| Other than Hindu     | 12 (34.3)                         | 23 (65.7)        |                  |    |              |
| <b>Ethnicity</b>     |                                   |                  |                  |    |              |
| Dalit                | 66 (77.6)                         | 19 (22.4)        | 28.965           | 3  | <0.001*      |
| Janajati             | 69 (58.5)                         | 49 (41.5)        |                  |    |              |
| Brahman/Chettri      | 69 (42.3)                         | 94 (57.7)        |                  |    |              |
| Religious Minorities | 9 (50)                            | 9 (50)           |                  |    |              |
| <b>Family size</b>   |                                   |                  |                  |    |              |
| ≤ 4                  | 115 (60.5)                        | 75 (39.5)        | 3.895            | 1  | <b>0.048</b> |
| >4                   | 98 (50.5)                         | 96 (49.5)        |                  |    |              |

257 The major findings indicate the age group ( $\chi^2 = 13.279$ , p-value < 0.001), religion ( $\chi^2 = 6.99$ ,  
258 p-value = 0.008), ethnicity ( $\chi^2 = 28.965$ , p-value < 0.001), and family size ( $\chi^2 = 3.895$ , p-value  
259 = 0.048), were significantly associated with the utilization of preconception care (Table 11).

260 **Association of Preconception Care Utilization and Socio-economic Characteristics**

261 Table12: Association of Preconception Care Utilization and Socio-economic Characteristics

| Variable                          | Utilization of Preconception care     |                                   | Chi-square Value | df | p-value  |
|-----------------------------------|---------------------------------------|-----------------------------------|------------------|----|----------|
|                                   | Low acceptance<br>n (%)<br>213(55.5%) | Acceptance<br>n (%)<br>171(44.5%) |                  |    |          |
| <b>Respondent Education level</b> |                                       |                                   |                  |    |          |
| Illiterate/informal               | 8 (66.7)                              | 4 (33.3)                          | 48.541           | 3  | < 0.001* |
| Basic                             | 58 (76.3)                             | 18 (23.7)                         |                  |    |          |
| Secondary                         | 121 (60.8)                            | 78 (39.2)                         |                  |    |          |
| Graduate and above                | 26 (26.8)                             | 71 (73.2)                         |                  |    |          |
| <b>Occupation respondent</b>      |                                       |                                   |                  |    |          |
| Housemaker                        | 138 (66)                              | 71 (34)                           | 27.158           | 3  | < 0.001* |
| Business                          | 24 (42.9)                             | 32 (57.1)                         |                  |    |          |
| Employed (Gov/Private)            | 21 (32.3)                             | 44 (67.7)                         |                  |    |          |
| Others                            | 30 (55.6)                             | 24 (44.4)                         |                  |    |          |
| <b>Husbands' education level</b>  |                                       |                                   |                  |    |          |
| Illiterate/informal               | 16 (66.7)                             | 8 (33.3)                          | 47.395           | 3  | < 0.001* |
| Basic                             | 59 (77.6)                             | 17 (22.4)                         |                  |    |          |
| Secondary                         | 107 (60.1)                            | 71 (39.9)                         |                  |    |          |
| Graduate and above                | 31 (29.2)                             | 75 (70.8)                         |                  |    |          |

| <b>Husband occupation</b>         |  |           |           |        |   |                   |
|-----------------------------------|--|-----------|-----------|--------|---|-------------------|
| Business                          |  | 47 (51.1) | 45 (48.9) | 14.764 | 3 | <b>0.002</b>      |
| Employed (Gov / Private)          |  | 49 (47.1) | 55 (52.9) |        |   |                   |
| Foreign Services                  |  | 56 (53.3) | 49 (46.7) |        |   |                   |
| Others                            |  | 61(73.5)  | 22 (26.5) |        |   |                   |
| <b>International wealth Index</b> |  |           |           |        |   |                   |
| Lowest                            |  | 53 (72.6) | 20 (27.4) | 36.851 | 4 | <b>&lt;0.001*</b> |
| Second                            |  | 60 (69.8) | 26 (30.3) |        |   |                   |
| Middle                            |  | 47 (56.6) | 36 (43.4) |        |   |                   |
| Fourth                            |  | 20 (30.8) | 45 (69.2) |        |   |                   |
| Highest                           |  | 33 (43.9) | 44 (57.1) |        |   |                   |

262 There is an association between the utilization of preconception care and the respondent's  
 263 socio-economic characteristics. Respondent education level ( $\chi^2 = 48.541$ , p-value < 0.001),  
 264 husband's education level ( $\chi^2 = 47.395$ , p-value < 0.001), respondent occupation ( $\chi^2 = 27.158$ ,  
 265 p-value < 0.001), husband's occupation ( $\chi^2 = 14.764$ , p-value = 0.002) and the international  
 266 wealth index ( $\chi^2 = 36.851$ , p-value < 0.001) displayed a significant association (Table 12).

267 **Association between Knowledge, attitude and heard about PCC with Preconception Care**  
 268 **Utilization**

269 Table13: Association between Knowledge, attitude and heard about PCC with Preconception  
 270 Care Utilization.



| Variable                                | Utilization of Preconception care     |                                   | Chi-square Value | Df | p-value  |
|-----------------------------------------|---------------------------------------|-----------------------------------|------------------|----|----------|
|                                         | Low acceptance<br>n (%)<br>213(55.5%) | Acceptance<br>n (%)<br>171(44.5%) |                  |    |          |
| <b>Knowledge on PCC</b>                 |                                       |                                   |                  |    |          |
| Poor Knowledge                          | 160 (79.6)                            | 41 (20.4)                         | 99.448           | 1  | <0.001*  |
| Good Knowledge                          | 53 (29)                               | 130 (71)                          |                  |    |          |
| <b>Attitude on PCC</b>                  |                                       |                                   |                  |    |          |
| Negative Attitude                       | 135 (65.2)                            | 72 (34.8)                         | 17.278           | 1  | <0.001*  |
| Positive Attitude                       | 78 (44.1)                             | 99 (55.9)                         |                  |    |          |
| <b>Heard about PCC before pregnancy</b> |                                       |                                   |                  |    |          |
| NO                                      | 129 (81.6)                            | 29 (18.4)                         | 74.473           | 1  | < 0.001* |
| Yes                                     | 84 (37.2)                             | 142 (62.8)                        |                  |    |          |

271 The utilization of preconception care shows significant associations with respondents'  
 272 knowledge ( $\chi^2 = 99.448$ , p-value < 0.001), attitude ( $\chi^2 = 17.278$ , p-value < 0.001) and prior  
 273 awareness of preconception care (PCC) ( $\chi^2 = 74.473$ , p-value < 0.001) (Table 13).

274 **Association between utilization of PCC with history of obstetrics and reproductive health**

275 Table 14: Association between utilization of PCC with history of obstetrics and reproductive  
 276 health

| Variables                     | Utilization of Preconception care      |                                 | Chi-square Value | Df | p-value |
|-------------------------------|----------------------------------------|---------------------------------|------------------|----|---------|
|                               | Low acceptance<br>n (%) 213<br>(55.5%) | Acceptance<br>n (%) 171 (44.5%) |                  |    |         |
| <b>Age at first pregnancy</b> |                                        |                                 |                  |    |         |
| ≤ 20 yrs                      | 68 (73.1)                              | 25 (26.9)                       | 15.477           | 1  | <0.001  |
| > 20 yrs                      | 145 (49.8)                             | 146 (50.2)                      |                  |    |         |

| <b>No of live birth</b>                  |            |            |        |   |         |
|------------------------------------------|------------|------------|--------|---|---------|
| Primipara                                | 106 (51.5) | 100 (48.5) | 2.897  | 1 | 0.089   |
| Multipara                                | 107 (60.1) | 71 (39.9)  |        |   |         |
| <b>Planned for pregnancy</b>             |            |            |        |   |         |
| No                                       | 106 (84.8) | 19 (15.2)  | 64.549 | 1 | < 0.001 |
| Yes                                      | 107 (41.3) | 152 (58.7) |        |   |         |
| <b>History of adverse health outcome</b> |            |            |        |   |         |
| No                                       | 167 (60.9) | 107 (39.1) | 11.630 | 1 | < 0.001 |
| Yes                                      | 46 (41.8)  | 64 (58.2)  |        |   |         |
| <b>PNC checkup last pregnancy</b>        |            |            |        |   |         |
| No                                       | 28 (70)    | 12 (30)    | 3.817  | 1 | 0.051   |
| Yes                                      | 185 (53.8) | 159 (46.2) |        |   |         |
| <b>Contraceptive use history</b>         |            |            |        |   |         |
| No                                       | 147 (58.1) | 106 (41.9) | 2.083  | 1 | 0.14    |
| Yes                                      | 66 (50.4)  | 65 (49.6)  |        |   |         |
| <b>History of Cesarean section</b>       |            |            |        |   |         |
| No                                       | 152 (58.7) | 107 (41.3) | 3.337  | 1 | 0.06    |
| Yes                                      | 61 (48.8)  | 64 (51.2)  |        |   |         |

277 The above table shows that there are significant associations with several variables. Age at first  
278 pregnancy ( $\chi^2 = 15.477$ , p-value < 0.001), planning for pregnancy ( $\chi^2 = 64.549$ , p-value <  
279 0.001) and history of adverse health ( $\chi^2 = 11.630$ , p-value < 0.001) was significantly associated  
280 with the utilization of PCC. However, there is no association with different variables such as  
281 include the number of live births ( $\chi^2 = 2.897$ , p-value = 0.089), PNC checkup during the last  
282 pregnancy ( $\chi^2 = 3.817$ , p-value = 0.051), contraceptive use history ( $\chi^2 = 2.083$ , p-value = 0.14),  
283 and history of Cesarean section ( $\chi^2 = 3.337$ , p-value = 0.06) (Table 14).

284 **Association between utilization of PCC and Health service-related characteristics**

285 Table 15: Association between utilization of PCC and Health service-related characteristics

| Variable                                             | Utilization of Preconception care |                  | Chi-square Value | Df | p-value           |
|------------------------------------------------------|-----------------------------------|------------------|------------------|----|-------------------|
|                                                      | Low acceptance n (%)              | Acceptance n (%) |                  |    |                   |
| <b>Minutes to reach health facilities</b>            |                                   |                  |                  |    |                   |
| ≤ 30 minutes                                         | 166 (52.5)                        | 150 (47.5)       | 6.232            | 1  | <b>0.01</b>       |
| >30 minutes                                          | 47 (69.1)                         | 21(30.9)         |                  |    |                   |
| Distance from health facilities                      |                                   |                  |                  |    |                   |
| ≤2 Km                                                | 79 (53.4)                         | 69 (46.6)        | .426             | 1  | 0.51              |
| > 2 Km                                               | 134 (56.8)                        | 102 (43.2)       |                  |    |                   |
| <b>Health insurance use before becoming pregnant</b> |                                   |                  |                  |    |                   |
| No                                                   | 154 (66.1)                        | 79 (33.9)        | 27.084           | 1  | <b>&lt;0.001</b>  |
| Yes                                                  | 59 (39.1)                         | 92 (60.9)        |                  |    |                   |
| <b>Autonomy to Maternal Health</b>                   |                                   |                  |                  |    |                   |
| Self                                                 | 114 (50)                          | 114 (50)         | 8.690            | 2  | <b>0.013</b>      |
| Husband                                              | 19 (76)                           | 6 (24)           |                  |    |                   |
| Both                                                 | 80 (61.1)                         | 51 (38.9)        |                  |    |                   |
| <b>Waiting time at health facilities</b>             |                                   |                  |                  |    |                   |
| ≤ 60 min                                             | 146 (61.9)                        | 90 (38.1)        | 10.140           | 1  | <b>&lt; 0.001</b> |
| > 60 min                                             | 67 (45.3)                         | 81(54.7)         |                  |    |                   |

286 There is a significant association between the health service-related variables and utilization of  
 287 PCC such as time to reach health facilities ( $\chi^2 = 6.232$ , p-value = 0.01), health insurance use  
 288 before pregnancy ( $\chi^2 = 27.084$ , p-value < 0.001), autonomy to maternal health ( $\chi^2 = 8.690$ , p-  
 289 value = 0.013), and waiting time at health facilities ( $\chi^2 = 10.140$ , p-value< 0.001). However,

290 the distance from health facilities did not show a significant association ( $\chi^2 = 0.426$ , p-value =  
291 0.51) with the utilization of preconception care (Table 15).

### 292 **4.3. Multivariate Analysis**

293 Bivariate analysis was performed to find out the association between dependent and  
294 independent variables and multivariate logistic regression models were analyzed to determine  
295 factors associated with the utilization of preconception care. variables with a p-value less than  
296 0.05 in the bivariable logistic regression were included in the multivariable logistic regression  
297 model Based on the conceptual framework three models of logistic regression were performed.  
298 In the first model dependent variable utilization of PCC and Sociodemographic characteristics  
299 were assessed, in the second model utilization of PCC and knowledge and attitude towards  
300 PCC, in the third model utilization of PCC and health service-related characteristics were  
301 assessed. Three models were developed, in the first model is age of respondents, Religion,  
302 family size, and occupation of the respondent, were assessed, In the second model, knowledge  
303 of PCC, attitude towards PCC and heard about were assessed, similarly, in the third model  
304 health service-related characteristics i.e., health insurance before pregnancy, minutes to reach  
305 health facilities, waiting time at health facilities, autonomy to maternal health were analyzed  
306 with dependent variables.

### 307 **Relationship between sociodemographic characteristics and Utilization of Preconception** 308 **care**

309 Table16: Relationship between sociodemographic characteristics and Utilization of  
310 preconception care.

311 Respondents aged 20-35 years are 9 times more likely to use preconception care services as  
 312 compared to those who are under 20 years AOR=9.0; CI (1.99-40.71) Similarly, respondents

| <b>Variable</b>                 | <b>Unadjusted OR<br/>(95% CI)</b> | <b>p-value</b> | <b>Adjusted OR<br/>(95% CI)</b> | <b>p-value</b>   |
|---------------------------------|-----------------------------------|----------------|---------------------------------|------------------|
| <b>Age of respondents</b>       |                                   |                |                                 |                  |
| < 20 Yrs                        | 1                                 |                | 1                               |                  |
| 20-35 Yrs.                      | 8.47(1.94-36.80)                  | 0.004          | 9.00(1.99-40.71)                | <b>0.004</b>     |
| > 35 Yrs                        | 14.0(2.64-73.98)                  | 0.002          | 13.89(2.49-77.33)               | <b>0.003</b>     |
| <b>Religion</b>                 |                                   |                |                                 |                  |
| Hindu                           | 1                                 |                | 1                               |                  |
| Others than Hindus              | 2.60(1.25-5.39)                   | 0.01           | 3.15(1.43-6.95)                 | <b>0.004</b>     |
| <b>Family size</b>              |                                   |                |                                 |                  |
| ≤ 4                             | 1                                 |                | 1                               |                  |
| >4                              | 1.50(1.00-2.25)                   | 0.049          | 1.22(0.79-1.88)                 | 0.36             |
| <b>Occupation of respondent</b> |                                   |                |                                 |                  |
| Housemaker                      | 1                                 |                | 1                               |                  |
| Other than Housemaker           | 2.59(1.71-3.92)                   | <0.001         | 2.58(1.67-3.99)                 | <b>&lt;0.001</b> |

313 aged more than 35 years are nearly 14 times more likely to utilize PCC as compared to under  
 314 20 years AOR=13.89; CI (2.49-77.33), this show as the age increases the utilization of PCC  
 315 also increases. participants who follow a religion other than Hinduism have 3.15 times more  
 316 chances to use PCC as compared to Hindus AOR=3.15, CI (1.43-6.95) Participants engaged in  
 317 other occupations besides housemaker are 2.58 times more likely to utilize PCC compared to  
 318 housemaker AOR=2.58; CI (1.67-3.99). The Nagelkerke R square in sociodemographic  
 319 characteristics is 0.148, which indicates 14.8%of the variance in the utilization of PCC (Table  
 320 16)

321 **Relationship between sociodemographic characteristics and Utilization of Preconception**  
 322 **care**

323 Table 17: Relationship between knowledge and attitude towards PCC and Utilization of  
 324 Preconception

| 325 | <b>Variable</b>                            | <b>Unadjusted</b> | <b>p-value</b> | <b>Adjusted</b> | <b>p-value</b> | The |
|-----|--------------------------------------------|-------------------|----------------|-----------------|----------------|-----|
| 326 |                                            | <b>OR</b>         |                | <b>OR</b>       |                |     |
|     |                                            | <b>(95% CI)</b>   |                | <b>(95% CI)</b> |                |     |
| 327 | <b>Knowledge of PCC</b>                    |                   |                |                 |                |     |
|     | Poor Knowledge                             | 1                 |                | 1               |                |     |
| 328 | Good Knowledge                             | 9.57(5.99-15.29)  | <0.001         | 5.12(2.99-8.77) | <0.001         |     |
| 329 | <b>Attitude towards Preconception care</b> |                   |                |                 |                |     |
|     | Negative attitude                          | 1                 |                | 1               |                |     |
|     | Positive attitude                          | 2.38(1.57-3.59)   | <0.001         | 1.92(1.18-3.12) | <0.001         |     |
|     | <b>Heard about PCC</b>                     |                   |                |                 |                |     |
|     | No                                         | 1                 |                | 1               |                |     |
|     | Yes                                        | 7.52(4.63-12.21)  | <0.001         | 3.15(1.77-5.59) | <0.001         |     |

330 Result revealed that the respondents who have good knowledge of PCC were more than 5 times  
 331 more likely to use PCC services as compared to those participants who had poor knowledge  
 332 AOR=5.12; CI (2.99-8.77). Similarly, respondents who had a positive attitude towards PCC  
 333 were nearly 2 times more likely to use PCC services as compared to those participants who had  
 334 a negative attitude AOR=1.92; CI (1.18-3.12) furthermore, the findings underscore respondents  
 335 who had heard about PCC were more than 3 times more likely to use PCC services while  
 336 comparing with those who had not heard about PCC AOR=3.15; CI (1.77-5.59). The  
 337 Nagelkerke R Square of this model is 0.377 which indicates 37.7% variability in utilization of  
 338 PCC (Table 17).

339 **Relationship between Health Services related characteristics and utilization of PCC**

340 Table18: Relationship between Health Services related characteristics and utilization of PCC

| <b>Variable</b> | <b>Unadjusted</b> | <b>p-value</b> | <b>Adjusted</b> | <b>p-value</b> |
|-----------------|-------------------|----------------|-----------------|----------------|
|                 | <b>OR</b>         |                | <b>OR</b>       |                |

|                                                      | (95% CI)        |        | (95% CI)        |                  |
|------------------------------------------------------|-----------------|--------|-----------------|------------------|
| <b>Minutes to reach health facilities</b>            |                 |        |                 |                  |
| ≤30 minutes                                          | 2.02(1.15-3.54) | 0.014  | 2.40(1.32-4.35) | <b>0.004</b>     |
| > 30 minutes                                         | 1               |        | 1               |                  |
| <b>Health Insurance use before becoming pregnant</b> |                 |        |                 |                  |
| No                                                   | 1               |        | 1               |                  |
| Yes                                                  | 3.04(1.98-4.64) | <0.001 | 2.68(1.71-4.19) | <b>&lt;0.001</b> |
| <b>Autonomy of Maternal Health</b>                   |                 |        |                 |                  |
| Self                                                 | 1.73(1.14-2.63) | 0.009  | 1.45(0.93-2.27) | 0.09             |
| Both (Husband and wife)                              | 1               |        | 1               |                  |
| <b>Waiting time at health facilities</b>             |                 |        |                 |                  |
| ≤60 min                                              | 1               |        | 1               |                  |
| > 60 min                                             | 1.96(1.29-2.97) | 0.002  | 1.60(1.02-2.50) | <b>0.04</b>      |

341 Respondents who reach health facilities within 30 minutes are 2.40 times more likely to utilize  
342 PCC compared to than who take more than 30 minutes. Similarly, participants who had health  
343 insurance before pregnancy are 2.68 times more likely to use PCC compared to those without  
344 health insurance. Respondents who wait more than 60 minutes at health facilities are 1.60 times  
345 more likely to utilize PCC compared to those who wait 60 minutes or less. Respondents who  
346 have autonomy in their maternal health decisions are 1.45 times more likely to utilize PCC  
347 compared to those where decisions are made jointly by both husband and wife, this result is  
348 not statistically significant after adjustment. The Nagelkerke R Square of this model is 0.14  
349 which indicates 14%variability in utilization of PCC (Table 18).

## 350 **DISCUSSION**

351 The current study aims to assess preconception care component utilization and its associated  
352 factors among reproductive-age women of Pokhara Metropolitan, Nepal.

353 This study revealed that only 1 (0.3%) of the participants received all 18 preconception care  
354 components before they underwent their last pregnancy. The possible explanation for these  
355 results might be due to the lack of awareness and less importance given to services of  
356 preconception care and mainly attention is given after conception. The acceptance level of  
357 preconception care components was 44.5% and the remaining 55% had a low acceptance level  
358 of utilization. This study is allied with the prior study conducted in Bheerkot, which indicated  
359 a 47.9% of good PCC practices<sup>8</sup>. However, a study in Bhutan demonstrated 21% Good Practice  
360 of PCC which is half of the findings of the current research.<sup>10</sup> Similarly study conducted in  
361 Nigeria 24.1%,<sup>19</sup> Ethiopia (22.3%)<sup>12</sup> show the lower utilization of PCC. The justification for  
362 this may be due to various perceptions of maternal health care in different cultures and  
363 variations in the socio-demographic characteristics of the study participants.

364 Furthermore, this study showed the most common component utilized by women is  
365 avoiding/cessation of cigarettes, the women who never smoked in their lives (96.9%) out of  
366 those who smoked cigarettes 66.7% stopped or reduced smoking before conception similarly  
367 study shows low cessation of smoking in (30.28%) China, Nigeria (27.2%)<sup>19,20</sup>. Taking a  
368 healthy diet before conception is high in Bheerkot (90.1%) and Guji Ethiopia (85.7%) and but  
369 less practice (49.2%) is seen in this study. Only 35.9% take folic acid which is in lined with  
370 study conducted in Bhutan (25%) and much lower in Kathmandu (4%) and in Ethiopia (13.2%)  
371 and higher intake in Sri Lanka (43.6%). Taking consulting for a healthy pregnancy is 35.2%  
372 in this study which is higher than the study done in Bhutan, Nigeria, Ethiopia <sup>10,19</sup>. Screening  
373 for STI is low (27.6%) in this study which is less than the study conducted in Guji Ethiopia  
374 (87.1%), Bhutan (39.7%) and similar to Osun, Nigeria (29.9%). Family planning method  
375 removal/stop is 35.9% in this study which is aligned with the study in Bhutan (37.7%)and  
376 higher than in Ethiopia (17.9%).<sup>10,18</sup>.



377 The planned pregnancy in this study was 67.4%, which is higher than the study conducted in  
378 Sri Lanka (62%) and South West Ethiopia (44.8%) and lower than the study conducted in  
379 Nigeria (77.7%)<sup>13,15,18</sup>The findings show there is a significant association between planned  
380 pregnancy and utilization of PCC ( $\chi^2 = 64.549$ , p-value < 0.001) the result was aligned with a  
381 study conducted in Nigeria, Adet, Northwestern Ethiopia<sup>2,13</sup>the justification for this result  
382 might be due to effective family planning interventions are in place. Mothers who had  
383 experienced adverse pregnancy outcomes showed statistically significant associations with the  
384 utilization of PCC ( $\chi^2 = 11.630$ , p-value < 0.001). Similar findings were seen in Southern  
385 Ethiopia and Northern Ethiopia<sup>6</sup>This result might be due to mothers who experience adverse  
386 pregnancy outcomes wanting to use PCC services to reduce potential risk for future pregnancy.

387 In this study, respondents aged 20-35 years are 9 times more likely to use preconception care  
388 services as compared to those who are under 20 years AOR=9.0; CI (1.99-40.71) Similarly,  
389 respondents aged more than 35 years are nearly 14 times more likely to utilize PCC as  
390 compared to under 20 years AOR=13.89; CI (2.49-77.33), this study is allied with the study  
391 conducted in Malaysia shows more than two times and in Nigeria 1.3 times utilization of PCC  
392 services as compared to their counterparts.<sup>13,21</sup> this shows as age increases the utilization of  
393 PCC also increases. This result might be due to increased health concerns and higher chances  
394 of pregnancy complications among older age groups which encourage them to seek PCC  
395 services. In this study participants who follow a religion other than Hinduism have 3.15 times  
396 more chances to use PCC as compared to Hindus. This may be due to socio-cultural belief or  
397 practices regarding preconception care. This study found that participants engaged in other  
398 occupations besides housemaker are 2.58 times more likely to utilize PCC compared to  
399 housemaker but in contrast, the study conducted in Malaysia, and Nigeria shows women who  
400 are not working utilize PCC services<sup>13,21</sup> the reason for that was working women are more

401 exposed to the information, and meeting with different people enhances the knowledge seeking  
402 for utilization of preconception care.

403 In this study respondents who had good knowledge of PCC were more than 5 times more likely  
404 to use PCC services as compared to those participants who had poor knowledge AOR=5.12;  
405 CI (2.99-8.77). These findings is consistent with the study conducted in West Guji Ethiopia  
406 and Southern Ethiopia which reported that individuals with poor knowledge of PCC had 47%  
407 and 82% reduced the chances of utilizing PCC compared with those with good knowledge.<sup>6,12</sup>  
408 This might be because having good knowledge increases the importance of preconception care  
409 which motivates them to utilize the PCC service. This study revealed that the respondents who  
410 had a positive attitude towards PCC were nearly 2 times more likely to use PCC services as  
411 compared to those with a negative attitude AOR=1.92; CI (1.18-3.12). This finding is  
412 consistent with similar research conducted in Mizan-Aman town in South-west Ethiopia<sup>22</sup> and  
413 almost 10 times more likely to utilize PCC services in the cross-section study conducted in  
414 West Guji, Ethiopia. <sup>12</sup> This result might be due to having a positive attitude toward PCC  
415 increases perceived benefit which encourages the individual to use the PCC services. This  
416 study shows respondents who had heard about PCC were more than 3 times more likely to use  
417 PCC services compared with those who had not heard about PCC AOR=3.15; CI (1.77-5.59).  
418 These findings is higher in research conducted in Malaysia and Southeastern Ethiopia showing  
419 more than 5 times increase the chances to use PCC services than their counterparts.<sup>21,23</sup> The  
420 possible explanation for this finding is that might be access to information through various  
421 sources such as social media, health worker.

422 This study revealed that the respondents who reach health facilities within 30 minutes are 2.40  
423 times more likely to utilize PCC than those who take more than 30 minutes. This study found  
424 similar results with the result conducted in Mizan Aman town, Southwest Ethiopia and the

425 southern part of Ethiopia<sup>22,24</sup>.The availability of health facilities nearer to respondent  
426 residential increases the likelihood of utilizing the PCC services. Similarly, participants who  
427 had health insurance before pregnancy are 2.68 times more likely to use PCC compared to  
428 those without health insurance. The study conducted in Iran shows that there is a relationship  
429 between the utilization of PCC services and women having Health insurance (P <0.001).  
430 Similarly, the cross-sectional study among 1,368 Jordanian women who had good utilization  
431 of PCC who have enrolled in private health insurance (19%) and Government 52.7%)<sup>25,26</sup>.For  
432 this the justification might be health insurance reduces the financial burden of health care  
433 services thus increasing the chances of seeking the care. Respondents who wait more than 60  
434 minutes at health facilities are 1.60 times more likely to utilize PCC compared to those who  
435 wait 60 minutes or less. The possible explanation for this result might be due to more emphasis  
436 and value given to health care services.

## 437 **Conclusion**

438 The study concludes that in Pokhara Metropolitan there is a low utilization of preconception  
439 care services among reproductive-age women. Only 0.3% of participants utilize all  
440 preconception care components before their last pregnancy. Only 44.5% had an acceptance  
441 level of utilization. The key factors associated with the utilization of PCC services are the age  
442 of the respondent, religion, occupation, knowledge, attitude towards PCC, heard about PCC,  
443 minutes to reach health facilities, health insurance use before pregnancy, and waiting time at  
444 health facilities. These studies highlight the need for targeted interventions to improve  
445 awareness and change in attitude towards PCC help to increase PCC services utilization thereby  
446 enhancing maternal and child health outcomes.

## 447 **Recommendation**

- 448 • Organize community-based educational programs focusing on the importance of PCC  
449 involving local leaders, teachers' community health workers and community  
450 volunteers.
- 451 • Use local media to share success stories and positive outcomes of PCC utilization. This  
452 can include radio programs and social media campaigns.
- 453 • Advocate for health insurance.
- 454 • Specific support and necessary counselling given by health facilities to address women  
455 with a history of adverse health outcomes.
- 456 • Initiation of an appointment system to reduce waiting time at health facilities.

## 457 **Acknowledgements:**

458 This study was supported by the Health Office, Kaski. The author would like to thank all the  
459 participants who gave their valuable time to make this study successful. Most importantly I

460 like to thank Pokhara Metropolitan for their cooperation and assistance in enabling access to  
461 the study sites and participants. I also want to acknowledge the School of Health and Allied  
462 Sciences, Pokhara University for the technical arrangements and support.

463 **Author Contributions:**

464 Conceptualization and Visualization: Sita Aryal, Dr. Tulsi Ram Bhandari

465 Data curation: Sita Aryal, Dr. Tulsi Ram Bhandari, Yamuna Marasini

466 Formal analysis: Sita Aryal, Dr. Tulsi Ram Bhandari, Yamuna Marasini

467 Investigation: Sita Aryal, Yamuna Marasini, Saroj Wagle

468 Methodology: Dr. Tulsi Ram Bhandari, Yamuna Marasini

469 Software: Sita Aryal, Yamuna Marasini

470 Supervision: Dr. Tulsi Ram Bhandari

471 Writing– original draft: Sita Aryal, Saroj Wagle

472 Writing– review & editing: Sita Aryal, Dr. Tulsi Ram Bhandari, Saroj Wagle

473 All the authors read, revised, and approved the final manuscript.

## 474 References

- 475 1. WHO. Preconception care to reduce maternal and childhood mortality and morbidity  
476 [Internet]. Preconception care to reduce maternal and childhood mortality and  
477 morbidity. 2013 [cited 2024 Jan 15]. Available from: [https://www.who.int/publications-](https://www.who.int/publications-detail-redirect/9789241505000)  
478 [detail-redirect/9789241505000](https://www.who.int/publications-detail-redirect/9789241505000)
- 479 2. Ayalew Y, Mulat A, Dile M, Simegn A. Women's knowledge and associated factors in  
480 preconception care in adet, west gojjam, northwest Ethiopia: a community based cross  
481 sectional study. *Reprod Health*. 2017 Jan 25;14(1):15.
- 482 3. de Weger FJ, Hukkelhoven CWPM, Serroyen J, te Velde ER, Smits LJM. Advanced  
483 maternal age, short interpregnancy interval, and perinatal outcome. *Am J Obstet*  
484 *Gynecol*. 2011 May;204(5):421.e1-9.
- 485 4. UN Sustainable Development U. Sustainable Development Goal 3: Good Health and  
486 Well-being | United Nations in Nepal [Internet]. [cited 2024 Jun 16]. Available from:  
487 <https://nepal.un.org/en/sdgs/3>
- 488 5. State of World Population 2022: Seeing the Unseen: The case for action in the neglected  
489 crisis of unintended pregnancy [EN/AR/RU] - World | ReliefWeb [Internet]. 2022 [cited  
490 2024 Feb 15]. Available from: [https://reliefweb.int/report/world/state-world-population-](https://reliefweb.int/report/world/state-world-population-2022-seeing-unseen-case-action-neglected-crisis-unintended)  
491 [2022-seeing-unseen-case-action-neglected-crisis-unintended](https://reliefweb.int/report/world/state-world-population-2022-seeing-unseen-case-action-neglected-crisis-unintended)
- 492 6. Wegene MA, Gejo NG, Bedecha DY, Kerbo AA, Hagisso SN, Damtew SA. Utilization  
493 of preconception care and associated factors in Hosanna Town, Southern Ethiopia.  
494 *PLOS ONE*. 2022 Jan 7;17(1):e0261895.
- 495 7. Aragaw FM, Amare T, Teklu RE, Tegegne BA, Alem AZ. Magnitude of unintended  
496 pregnancy and its determinants among childbearing age women in low and middle-  
497 income countries: evidence from 61 low and middle income countries. *Front Reprod*  
498 *Health* [Internet]. 2023 [cited 2024 Jan 19];5. Available from:  
499 <https://www.frontiersin.org/articles/10.3389/frph.2023.1113926>
- 500 8. Godar M, Sharma K, Adhikari KR. Knowledge And Practice of Preconception Care  
501 Among Women of Reproductive-Age in Bheerkot Municipality, Nepal. *J Womans*  
502 *Reprod Health*. 2023;
- 503 9. WHO. Born too soon: The global action report on preterm birth [Internet]. 2012 [cited  
504 2024 Jan 19]. Available from: [https://www.who.int/publications-detail-](https://www.who.int/publications-detail-redirect/9789241503433)  
505 [redirect/9789241503433](https://www.who.int/publications-detail-redirect/9789241503433)
- 506 10. Gyamtsho S, Tenzin K, Bhutia PC, Tshomo T, Choeda T. Assessment of knowledge,  
507 attitude, and practice on preconception care among pregnant women at National  
508 Hospital, Thimphu, Bhutan. *Bhutan Health J*. 2022 May 31;8(1):1–7.
- 509 11. Young MF, Oaks BM, Tandon S, Martorell R, Dewey KG, Wendt AS. Maternal  
510 hemoglobin concentrations across pregnancy and maternal and child health: a  
511 systematic review and meta-analysis. *Ann N Y Acad Sci*. 2019;1450(1):47–68.

- 512 12. Amaje E, Fikrie A, Utura T. Utilization of Preconception Care and Its Associated  
513 Factors among Pregnant Women of West Guji Zone, Oromia, Ethiopia, 2021: A  
514 Community-Based Cross-Sectional Study. *Health Serv Res Manag Epidemiol*. 2022  
515 Jan;9:233339282210887.
- 516 13. C.H.O. C, N.C. E, N.O. C, M.I. A. Preconception Care Utilization among Childbearing  
517 Women in South-East Nigeria. *Afr J Health Nurs Midwifery*. 2021 Sep 22;4(6):1–13.
- 518 14. Khanal LD. Knowledge and utilization of preconception care among women in selected  
519 community of Kathmandu. *J Patan Acad Health Sci*. 2020 Sep 15;7(2):112–23.
- 520 15. Patabendige M, Goonewardene IMR. Preconception care received by women attending  
521 antenatal clinics at a Teaching Hospital in Southern Sri Lanka. 2013 Sep 2;35(1):3.
- 522 16. Madanat AY, Sheshah EA. Preconception care in Saudi women with diabetes mellitus. *J*  
523 *Fam Community Med*. 2016;23(2):109–14.
- 524 17. Ding Y, Li XT, Xie F, Yang YL. Survey on the Implementation of Preconception Care  
525 in Shanghai, China. *Paediatr Perinat Epidemiol*. 2015;29(6):492–500.
- 526 18. Setegn Alie M, Alemu T, Alemayehu D, Negesse Y, Gebremariam A. Preconception  
527 care utilization and associated factors among reproductive age women in Mizan-Aman  
528 town, Bench Sheko zone, Southwest Ethiopia, 2020. A content analysis. *PloS One*.  
529 2022;17(8):e0273297.
- 530 19. Olowokere AE, Komolafe A, Owofadeju C. Awareness, knowledge and uptake of  
531 preconception care among women in Ife Central Local Government Area of Osun State,  
532 Nigeria. *J Community Med Prim Health Care*. 2015;27(2):83–92.
- 533 20. Du L, La X, Zhu L, Jiang H, Xu B, Chen A, et al. Utilization of preconception care and  
534 its impacts on health behavior changes among expectant couples in Shanghai, China.  
535 *BMC Pregnancy Childbirth*. 2021 Jul 7;21(1):491.
- 536 21. TALIB R, Idris I, Sutan R, AHMAD N, BAKAR N. Patterns of Pre-pregnancy Care  
537 Usage among Reproductive Age Women in Kedah, Malaysia. *Iran J Public Health*. 2018  
538 Nov 1;47:1694–702.
- 539 22. Setegn M. Intention to use and its predictors towards preconception care utilization  
540 among reproductive age women in Mizan-Aman town, Bench-Sheko Zone, southwest  
541 Ethiopia, 2020: Based on Theory of planned behaviour [Internet]. 2021 [cited 2024 Feb  
542 15]. Available from: <https://www.researchsquare.com/article/rs-391295/v1>
- 543 23. Gelgalu T. Preconception Care Utilization and Associated Factors Among Pregnant  
544 Women Attending Antenatal Care in Public Health Facilities of Shashemene south  
545 eastern Ethiopia: Institutional-Based CrossSectional Study [Internet] [Thesis]. 2021  
546 [cited 2024 Feb 15]. Available from: <http://etd.hu.edu.et/handle/123456789/3434>
- 547 24. Habte A, Dessu S, Haile D. Determinants of practice of preconception care among  
548 women of reproductive age group in southern Ethiopia, 2020: content analysis.  
549 *Reproductive Health*. 2021 May 21;18(1):100.

- 550 25. Ebadi T, Narjes Sadat B, Bayrami R, Mehrbakhsh Z. Preconception Care Patterns and  
551 Some Related Factors in Pregnant Women in Gorgan in 2017. *J Res Dev Nurs*  
552 *Midwifery*. 2019 Nov 10;16(2):30–40.
- 553 26. Alkhatib B, Agraib LM, Hourani HA, Hasan H. Assessing the Provision of  
554 Preconception Care Knowledge, Attitudes, and Practice Among Jordanian Women of  
555 Reproductive Age. *Sage Open*. 2024 Apr 1;14(2):21582440241245221.
- 556
